# Supplementary material for: A Ketogenic Diet Enhances Aerobic Exercise Adaptation and Promotes Muscle Mitochondrial Remodeling in Hyperglycemic Mice.
Source: Research Square preprint supplement (doi:10.21203/rs.3.rs-5814971/v1), 2025-01-29
Supplement: Supplementary file 1 [file 8995b42c78cc601ab59c0af5.xlsx]

## Sheet: Serum
Protein symbol	CON-CHOW	STZ-CHOW	STZ-KETO
ET1	1.58719	0.784768	1.04741
FGF7	1.38103	0.832301	1.27152
METH1	1.07755	0.606257	1.21436		Range from highest-lowest fold change difference between exercised-trained CON-CHOW and STZ-CHOW
ECGF	1.31718	0.864721	1.01661
VEGF-B	1.22766	0.777597	0.968213
DLL4	1.23914	0.83533	1.16918
FGF1	0.890009	0.501974	2.0368
FGF2	1.3172	0.939458	2.70188
IL-10	1.1913	0.813588	1.01868
CX3CL1	1.26405	0.904416	1.00257
HGF	1.05229	0.709946	1.55386
PDGF-AA	0.775303	0.436709	0.734608
EGF	1.17288	0.837866	1.06283
CXCL10	1.24322	0.912744	0.997292
CCL3	1.23343	0.9031	0.990781
CSF	1.10855	0.856641	1.281
CYR61	1.17621	0.927078	1.04989
PRL	1.16152	0.921711	1.84483
CD105	1.26037	1.02459	1.25585
PDGF-BB	0.794408	0.571372	1.04563
IL-1α	1.08455	0.87897	0.979586
TIMP1	1.15683	0.966052	0.959205
COLXVIII	1.11248	0.926575	0.906061
VEGF	0.994202	0.825794	0.961875
TIMP4	0.975951	0.818528	0.643419
PAI1	1.10156	0.950921	1.22727
ANG1	0.812989	0.664171	1.14534
MMP3	0.898183	0.751309	0.732998
MCP1	1.00049	0.853638	0.776447
OPN	1.00251	0.859786	0.859648
IGFBP-2	0.939455	0.804597	0.704766
HB-EGF	1.02478	0.913063	1.07227
TSP2	0.878061	0.770577	0.861591
PTX3	0.871239	0.797341	0.686909
IGFBP-3	0.903642	0.830655	0.888432
PLF	1.02417	0.954733	0.959728
CXCL4	1.00946	0.940041	0.737508
TF	1.25	1.18084	1.52935
AR	1.03487	0.974981	1.09626
IGFBP-1	1.148	1.09124	0.790474
SDF-1	0.922195	0.870724	0.906652
CXCL1	0.978212	0.978671	0.979149
PEDF	0.869637	0.896544	0.723565
ANG3	0.913212	0.944981	0.907502
ANG	0.804395	0.862705	0.748962
MMP8	0.82693	0.897501	0.757928
PlGF2	1.04473	1.1155	1.20291
DPPIV	1.05952	1.16989	0.979081
CCN3	1.00902	1.13584	0.95164
CXCL16	0.99631	1.16488	1.38785
LEP	0.479649	0.682795	0.540389
MMP9	0.844279	1.14242	0.799516
